# Supplementary material for: The Impact of Venous Invasion on the Postoperative Recurrence of pT1–3N0cM0 Gastric Cancer
Source: MDPI journal article supplement (doi:10.3390/jpm13050734), 2023-04-26
Supplement: s1 [file s1]

**Table S1.** Adjuvant chemotherapy in relation to depth of tumor invasion and grade of venous invasion.

|           |     | Adjuvant chemotherapy |    |         | Total |
|-----------|-----|-----------------------|----|---------|-------|
|           |     | Yes                   | No | unknown |       |
| VI grade* | v0  | 0                     | 47 | 8       | 55    |
|           | v1  | 4                     | 19 | 4       | 27    |
|           | v2  | 3                     | 4  | 0       | 7     |
|           | v3  | 2                     | 3  | 0       | 5     |
| pT**      | pT1 | 0                     | 59 | 10      | 69    |
|           | pT2 | 1                     | 7  | 1       | 9     |
|           | pT3 | 8                     | 7  | 1       | 16    |

\*Yes *vs.* No;  $p < 0.001$  by Chi-square test with Yates' correction. \*\*Yes *vs.* No;  $p < 0.001$  by Chi-square test with Yates' correction. VI, venous invasion; pT, pathological depth of tumor invasion; v0, no venous invasion; v1, 1-3 invasions/slide; v2, 4-6 invasions/slide; v3,  $\geq 7$  invasions/slide. Filling-type of venous invasion in a macroscopically identifiable vein with a minor axis of  $\geq 1$  mm increased the VI grade by 1.
